# Supplementary material
Source: PubMed Central journal article supplement (PMC5669486)
Supplement: NIHMS74485-supplement-Tables_S1-S8.pdf [file NIHMS74485-supplement-Tables_S1-S8.pdf]

| <b>Lentiviral Vector (LV) BATCH</b> |                     | <b>2009/D2</b>             | <b>2011/D13-15</b>         | <b>2012/DG</b>             |
|-------------------------------------|---------------------|----------------------------|----------------------------|----------------------------|
| Particles/ml                        | µg p24/ml           | 5.4                        | 6.3                        | 13.7                       |
| Titer                               | TU/ml               | 7.0x10 <sup>7</sup>        | 2.7x10 <sup>8</sup>        | 8.5x10 <sup>7</sup>        |
| Infectivity                         | TU/ng p24           | 1.3x10 <sup>4</sup>        | 4.4x10 <sup>4</sup>        | 6.2x10 <sup>3</sup>        |
| Transgene Activity                  |                     | Positive                   | Positive                   | Positive                   |
| Total DNA                           | µg/ml               | 2.6                        | 1.4                        | 0.4                        |
| Producer cell protein               | ng/ml               | 82                         | 221                        | 210                        |
| Endotoxin                           | EU/ml               | 0.3                        | <0.8                       | <0.5                       |
| Sterility                           |                     | Negative                   | Negative                   | Negative                   |
| RCL                                 |                     | Negative                   | Negative                   | NA                         |
| Dose Volume                         | Total ml            | 160                        | 164                        | 230                        |
| <b>Dose Particles</b>               | <b>Total µg p24</b> | <b>864</b>                 | <b>1030</b>                | <b>3151</b>                |
| <b>Dose TU</b>                      | <b>Total TU</b>     | <b>1.1x10<sup>10</sup></b> | <b>4.5x10<sup>10</sup></b> | <b>2.0x10<sup>10</sup></b> |
| Dose Endotoxin                      | Total EU            | 48                         | <137                       | <115                       |
|                                     |                     |                            |                            |                            |
| Transgene                           |                     | wildtype (wt) cFIX         | co-cFIX                    | co-cFIXR338L               |
| Dog                                 |                     | M57                        | O21                        | O59                        |

**Table S1: Large-scale lentiviral vector batches.** The table shows the results of selected quality control assays performed on the large-scale purified LV batches. EU: endotoxin units. NA: not available. TU: transducing units.

| Dog | Day      | PLT                                         | WBC                                          | HCT    | HGB               | CPK           | ALK PHOS     | ALT           | AST          | Tot Bili      | Amyl            | Urea N          | Creat           | BUN/ Creat | Total Protein  | Alb             | Glu             | Chol            | Ca+               | P                | Na+              | K+               | Cl-              | Alb/Glob | Glob            | Lip           | Triglyc         | GGTP          | Mg+              |  |
|-----|----------|---------------------------------------------|----------------------------------------------|--------|-------------------|---------------|--------------|---------------|--------------|---------------|-----------------|-----------------|-----------------|------------|----------------|-----------------|-----------------|-----------------|-------------------|------------------|------------------|------------------|------------------|----------|-----------------|---------------|-----------------|---------------|------------------|--|
| M57 | post LV  | 200-500<br>10 <sup>3</sup> /mm <sup>3</sup> | 6.0-17.0<br>10 <sup>3</sup> /mm <sup>3</sup> | 37-55% | 12.0-18.0<br>g/dL | 59-895<br>U/L | 5-131<br>U/L | 12-118<br>U/L | 15-66<br>U/L | .1-3<br>mg/dL | 290-1125<br>U/L | 6.0-31<br>mg/dL | .5-1.6<br>mg/dL | 4.0-27     | 5.0-7.4<br>g/L | 2.7-4.4<br>g/dL | 70-136<br>mg/dL | 92-324<br>mg/dL | 8.9-11.4<br>mg/dL | 2.5-6.0<br>mg/dL | 139-154<br>mEq/L | 3.6-5.5<br>mEq/L | 102-120<br>mEq/L | .8-2.0   | 1.6-3.6<br>g/dL | 77-695<br>U/L | 29-291<br>mg/dL | 1.0-12<br>U/L | 1.5-2.5<br>mEq/L |  |
|     | Baseline | 203                                         | 10,7                                         | 41,9   | 13,4              | 114           | 75           | 43            | 18           | 0,1           | 1410 H          | 11              | 0,5             | 22         | 6              | 3,5             | 121             | 217             | 10                | 6                | 146              | 4,3              | 111              | 1,4      | 2,5             | 807 H         | 36              | <5            | 1,5              |  |
|     | 1        | 160 L                                       | 4.8 L                                        | 41,7   | 13,5              | 241           | 81           | 261 H         | 204 H        | 0,3           | 748             | 13              | 0,5             | 26         | 5,2            | 3,1             | 96              | 172             | 9,6               | 5,8              | 152              | 3,8              | 115              | 1,5      | 2,1             | 188           | 32              | <5            | 1,3 L            |  |
|     | 2        | 112 L                                       | 12                                           | 31,7 L | 10,7 L            | 789           | 47           | 251 H         | 52           | 0,1           | 444             | 8               | 0,4 L           | 20         | 5              | 2,8             | 87              | 156             | 7,3 L             | 3,8              | 178 H            | 3,1 L            | 98 L             | 1,3      | 2,2             | 150           | 31              | <5            | 1,2 L            |  |
|     | 3        | 144 L                                       | 15,6                                         | 37,3   | 12,2              | 192           | 77           | 206 H         | 20           | 0,1           | 658             | 10              | 0,4 L           | 25         | 6,3            | 3,5             | 116             | 226             | 10,3              | 6,8 H            | 144              | 4                | 110              | 1,3      | 2,8             | 161           | 48              | <5            | 1,5              |  |
|     | 4        | 182 L                                       | 9,8                                          | 39,3   | 12,8              | 141           | 70           | 152 H         | 18           | 0,1           | 850             | 9               | 0,5             | 18         | 6,2            | 3,5             | 125             | 225             | 10,2              | 5,7              | 147              | 4,2              | 112              | 1,3      | 2,7             | 259           | 44              | <5            | 1,4 L            |  |
|     | 7        | 306                                         | 15,6                                         | 41     | 13,4              | 143           | 68           | 78            | 20           | 0,1           | 810             | 10              | 0,5             | 20         | 6,2            | 3,6             | 98              | 198             | 10,3              | 6,9 H            | 147              | 4,7              | 111              | 1,4      | 2,6             | 253           | 52              | 5             | 1,6              |  |
|     | 8        |                                             |                                              |        |                   | 226           | 69           | 59            | 22           | 0,1           | 598             | 15              | 0,8             | 19         | 5,7            | 3,3             | 113             | 178             | 10,5              | 6,5              | 143              | 4,9              | 110              | 1,4      | 2,4             | 130           | 130             | <5            | 1,6              |  |
|     | 9        |                                             |                                              |        |                   | 98            | 57           | 45            | 18           | 0,1           | 731             | 17              | 1,1             | 15         | 5,1            | 3               | 98              | 160             | 9,9               | 7,5 H            | 146              | 5,5              | 111              | 1,4      | 2,1             | 106           | 44              | <5            | 1,6              |  |
|     | 10       |                                             |                                              |        |                   | 95            | 57           | 44            | 26           | 0,1           | 806             | 18              | 0,9             | 20         | 5,3            | 3,2             | 113             | 174             | 9,9               | 6,1 H            | 148              | 4,9              | 111              | 1,5      | 2,1             | 133           | 81              | <5            | 1,5              |  |
|     | 11       |                                             |                                              |        |                   | 100           | 62           | 64            | 27           | 0,1           | 725             | 15              | 0,7             | 21         | 5,8            | 3,4             | 103             | 193             | 10,4              | 7,0 H            | 147              | 4,5              | 111              | 1,4      | 2,4             | 100           | 38              | 5             | 1,6              |  |
| *   | 14       | 121 L                                       | 22,5 H                                       | 22,4 L | 7,2 L             | 88            | 41           | 26            | 17           | 0,2           | 407             | 37 H            | 0,6             | 62 H       | 4,5 L          | 2,7             | 157 H           | 135             | 8,8 L             | 6,2 H            | 138 L            | 4,2              | 101 L            | 1,5      | 1,8             | 74 L          | 67              | <5            | 1,7              |  |
|     | 15       | 75 L                                        |                                              | 13,2   | 43,2              | 14,1          |              |               |              |               |                 |                 |                 |            |                |                 |                 |                 |                   |                  |                  |                  |                  |          |                 |               |                 |               |                  |  |
| *   | 16       | 134 L                                       |                                              | 15,4   | 52,4              | 17,1          |              |               |              |               |                 |                 |                 |            |                |                 |                 |                 |                   |                  |                  |                  |                  |          |                 |               |                 |               |                  |  |
|     | 24       | 239                                         | 13,8                                         | 53     | 17,1              | 140           | 82           | 32            | 23           | 0,2           | 930             | 15              | 0,8             | 19         | 5,7            | 3,4             | 105             | 178             | 10,4              | 6,3 H            | 143              | 5                | 110              | 1,5      | 2,3             | 226           | 42              | <5            | 1,5              |  |
|     | 29       | 133 L                                       | 8,5                                          | 47,8   | 15,7              | 158           | 61           | 33            | 22           | 0,2           | 678             | 12              | 0,6             | 20         | 5,9            | 3,2             | 104             | 161             | 10,4              | 5,9              | 143              | 4,8              | 112              | 1,2      | 2,7             | 146           | 40              | <5            | 1,3 L            |  |
|     | 39       | 179                                         | 12,6                                         | 48     | 14,9              |               |              |               |              |               |                 |                 |                 |            |                |                 |                 |                 |                   |                  |                  |                  |                  |          |                 |               |                 |               |                  |  |
|     | 50       | 230                                         | 11,2                                         | 50,9   | 16                |               |              |               |              |               |                 |                 |                 |            |                |                 |                 |                 |                   |                  |                  |                  |                  |          |                 |               |                 |               |                  |  |
|     | 58       | 263                                         | 10,8                                         | 49,5   | 15,9              |               |              |               |              |               |                 |                 |                 |            |                |                 |                 |                 |                   |                  |                  |                  |                  |          |                 |               |                 |               |                  |  |
|     | 63       | 179 L                                       | 10,9                                         | 48,5   | 15,3              |               |              |               |              |               |                 |                 |                 |            |                |                 |                 |                 |                   |                  |                  |                  |                  |          |                 |               |                 |               |                  |  |
|     | 72       | 286                                         | 7                                            | 58,4 H | 17,8              |               |              |               |              |               |                 |                 |                 |            |                |                 |                 |                 |                   |                  |                  |                  |                  |          |                 |               |                 |               |                  |  |
|     | 87       | 239                                         | 11,8                                         | 54,5   | 16,4              | 80            | 43           | 77            | 17           | 0,1           | 936             | 19              | 0,9             | 21         | 5,9            | 3,4             | 108             | 156             | 10,3              | 6,3 H            | 150              | 4,8              | 114              | 1,4      | 2,5             | 347           | 34              | <5            | 1,7              |  |
|     | 119      | 282                                         | 12,1                                         | 47,2   | 15,3              |               |              |               |              |               |                 |                 |                 |            |                |                 |                 |                 |                   |                  |                  |                  |                  |          |                 |               |                 |               |                  |  |
|     | 150      | 228                                         | 12,7                                         | 47,8   | 15,4              |               |              |               |              |               |                 |                 |                 |            |                |                 |                 |                 |                   |                  |                  |                  |                  |          |                 |               |                 |               |                  |  |
|     | 181      | 239                                         | 9,4                                          | 52,1   | 16,9              | 120           | 44           | 57            | 23           | 0,1           | 627             | 13              | 0,6             | 22         | 5,7            | 3,3             | 104             | 124             | 10                | 4,9              | 142              | 4,7              | 106              | 1,4      | 2,4             | 182           | 29              | <5            | 1,5              |  |
|     | 199      | 181 L                                       | 10,9                                         | 51,7   | 16,3              |               |              |               |              |               |                 |                 |                 |            |                |                 |                 |                 |                   |                  |                  |                  |                  |          |                 |               |                 |               |                  |  |
|     | 237      | 237                                         | 9,9                                          | 52,1   | 17,1              |               |              |               |              |               |                 |                 |                 |            |                |                 |                 |                 |                   |                  |                  |                  |                  |          |                 |               |                 |               |                  |  |
|     | 273      | 245                                         | 10,7                                         | 51,1   | 16,5              | 173           | 36           | 62            | 25           | 0,1           | 808             | 14              | 0,7             | 20         | 5,8            | 3,6             | 104             | 127             | 10,1              | 4,5              | 145              | 4,6              | 111              | 1,6      | 2,2             | 193           | 30              | <5            | 1,6              |  |
|     | 307      | 234                                         | 10,6                                         | 49,5   | 15,9              |               |              |               |              |               |                 |                 |                 |            |                |                 |                 |                 |                   |                  |                  |                  |                  |          |                 |               |                 |               |                  |  |
|     | 352      | 204                                         | 7,8                                          | 54,6   | 17,4              |               |              |               |              |               |                 |                 |                 |            |                |                 |                 |                 |                   |                  |                  |                  |                  |          |                 |               |                 |               |                  |  |
|     | 437      | 277                                         | 11,9                                         | 51,2   | 16,4              | 143           | 21           | 90            | 33           | 0,1           | 544             | 19              | 0,8             | 24         | 5,9            | 3,7             | 78              | 117             | 9,7               | 4,5              | 148              | 4,7              | 116              | 1,7      | 2,2             | 137           | 40              | <5            |                  |  |
|     | 532      | 171 L                                       | 10,1                                         | 56,9 H | 18,3 H            | 157           | 25           | 84            | 23           | 0,1           | 692             | 11              | 0,8             | 14         | 6,1            | 3,7             | 103             | 126             | 10                | 3,9              | 146              | 4,6              | 113              | 1,5      | 2,4             | 175           | 30              | <5            | 1,6              |  |
|     | 612      | 269                                         | 10,7                                         | 55     | 18,5 H            | 82            | 30           | 135 H         | 55           | 0,1           | 670             | 29              | 0,9             | 32 H       | 6,4            | 3,8             | 71              | 130             | 10,2              | 3,8              | 150              | 5                | 114              | 1,5      | 2,6             | 201           | 131             | 5             | 1,8              |  |
|     | 709      | 171 L                                       | 10,1                                         | 55,6 H | 17,5              | 160           | 24           | 90            | 24           | 0,1           | 642             | 16              | 0,8             | 20         | 5,8            | 3,3             | 78              | 128             | 9,6               | 3,5              | 146              | 4,8              | 111              | 1,3      | 2,5             | 140           | 28              | 5             | 1,7              |  |
|     | 840      | 179 L                                       | 9,7                                          | 56,4 H | 17,4              | 115           | 22           | 90            | 22           | 0,1           | 681             | 15              | 0,9             | 17         | 6,6            | 3,7             | 107             | 134             | 10,1              | 4,1              | 146              | 4,3              | 113              | 1,3      | 2,9             | 203           | 32              | <5            | 1,8              |  |
|     | 927      | 187 L                                       | 11,4                                         | 55,1 H | 18,2 H            | 119           | 25           | 149 H         | 26           | 0,1           | 707             | 15              | 0,7             | 21         | 6,3            | 3,8             | 76              | 131             | 9,7               | 4,3              | 148              | 4,7              | 112              | 1,5      | 2,5             | 108           | 39              | 6             | 1,8              |  |
|     | 1024     | 165 L                                       | 9                                            | 54,3   | 18,8 H            | 139           | 24           | 123 H         | 32           | 0,1           | 617             | 17              | 0,7             | 24         | 6,2            | 3,7             | 94              | 147             | 10,2              | 4,3              | 146              | 4,5              | 112              | 1,5      | 2,5             | 140           | 48              | 6             | 1,7              |  |
|     | 1116     | 136 L                                       | 9,4                                          | 53,7   | 18,4 H            | 214           | 20           | 126 H         | 29           | 0,1           | 676             | 13              | 0,8             | 16         | 6,3            | 3,8             | 85              | 141             | 10                | 3,8              | 141              | 4,4              | 106              | 1,5      | 2,5             | 198           | 34              | 5             | 1,7              |  |
|     | 1206     | 291                                         | 12,8                                         | 51,6   | 15,6              | 148           | 54           | 96            | 29           | 0,1           | 804             | 14              | 0,6             | 23         | 6,6            | 3,6             | 85              | 112             | 9,9               | 4,1              | 148              | 5,1              | 112              | 1,2      | 3               | 90            | 40              | 5             | 1,8              |  |
|     | 1289     | 152 L                                       | 10,4                                         | 56,9 H | 17,8              | 146           | 21           | 75            | 26           | 0,1           | 672             | 16              | 0,8             | 20         | 6,3            | 3,5             | 86              | 123             | 10                | 3,5              | 147              | 4,6              | 115              | 1,3      | 2,8             | 154           | 37              | 5             | 1,7              |  |
|     | 1375     | 197 L                                       | 11,3                                         | 52     | 16,5              | 163           | 25           | 84            | 24           | 0,1           | 1080            | 15              | 0,7             | 21         | 6,3            | 3,6             | 75              | 122             | 9,9               | 3,5              | 147              | 4,5              | 112              | 1,3      | 2,7             | 344           | 28 L            | <5            | 1,7              |  |
|     | 1486     | 187 L                                       | 9,8                                          | 55,8 H | 17,2              | 171           | 27           | 114           | 25           | 0,1           | 1352 H          | 12              | 0,7             | 17         | 6,5            | 3,7             | 72              | 175             | 9,7               | 3,6              | 148              | 4,7              | 113              | 1,3      | 2,8             | 606           | 54              | <5            | 1,6              |  |
|     | 1562     | 146 L                                       | 9,8                                          | 54,1   | 18,1 H            |               |              |               |              |               |                 |                 |                 |            |                |                 |                 |                 |                   |                  |                  |                  |                  |          |                 |               |                 |               |                  |  |
|     | 1647     | 162 L                                       | 9,9                                          | 53,9   | 16,7              | 158           | 33           | 97            | 24           | 0,1           | 801             | 11              | 0,7             | 16         | 6,8            | 3,6             | 83              | 156             | 9,9               | 4,1              | 147              | 4,6              | 113              | 1,1      | 3,2             | 178           | 32              | 5             | 1,7              |  |
|     | 1754     | 197 L                                       | 10,1                                         | 51,6   | 16,4              | 147           | 37           | 87            | 28           | 0,1           | 628             | 13              | 0,7             | 19         | 6,1            | 3,3             | 93              | 166             | 9,9               | 3,8              | 153              | 4,8              | 118              | 1,2      | 2,8             | 124           | 40              | 5             | 1,5              |  |

\* abdominal bleeding

**Table S2: Blood cell counts and blood chemistry in M57.** The table shows the results of blood cell counts and blood chemistry parameters in M57 blood samples analyzed before (baseline) or at the indicated day after lentiviral vector administration (post LV). The reference normal range is indicated. Values lower than normal are shown in blue and followed by “L”; values higher than normal are shown in red and followed by “H”. PLT: platelets. WBC: white blood cells. HCT: hematocrit. HGB: hemoglobin. CPK: creatine phosphokinase. ALK PHOS: alkaline phosphatase. ALT: alanine aminotransferase. AST: aspartate aminotransferase. Tot Bili: total bilirubin. Amyl: amylase. Creat: creatinin. BUN: blood urea nitrogen. Alb: albumin. Glu: glucose. Chol: cholesterol. Glob: globulin. Lip: lipoproteins. Triglyc: triglycerides. GGTP: gamma-glutamyl transpeptidase.

| Dog      | Day     | PLT                                         | WBC                                          | HCT    | HGB               | CPK           | ALK PHOS     | ALT           | AST          | Tot Billi     | Amyl            | Urea N          | Creat           | BUN/ Creat | Total Protein  | Alb             | Gluc            | Chol            | Ca+               | P                | Na+              | K+               | Cl-              | Alb/ Glob | Glob            | Lip           | Triglyc         | GGTP          | Mg+              |
|----------|---------|---------------------------------------------|----------------------------------------------|--------|-------------------|---------------|--------------|---------------|--------------|---------------|-----------------|-----------------|-----------------|------------|----------------|-----------------|-----------------|-----------------|-------------------|------------------|------------------|------------------|------------------|-----------|-----------------|---------------|-----------------|---------------|------------------|
| O21      | post-LV | 200-500<br>10 <sup>3</sup> /mm <sup>3</sup> | 6.0-17.0<br>10 <sup>3</sup> /mm <sup>3</sup> | 37-55% | 12.0-18.0<br>g/dL | 59-895<br>U/L | 5-131<br>U/L | 12-118<br>U/L | 15-66<br>U/L | .1-3<br>mg/dL | 290-1125<br>U/L | 6.0-25<br>mg/dL | .5-1.6<br>mg/dL | 4.0-27     | 5.0-7.4<br>g/L | 2.7-4.4<br>g/dL | 70-136<br>mg/dL | 92-324<br>mg/dL | 8.9-11.4<br>mg/dL | 2.5-6.0<br>mg/dL | 139-154<br>mEq/L | 3.6-5.5<br>mEq/L | 102-120<br>mEq/L | .8-2.0    | 1.6-3.6<br>g/dL | 77-695<br>U/L | 29-291<br>mg/dL | 1.0-12<br>U/L | 1.5-2.5<br>mEq/L |
| Baseline | 264     | 10                                          | 49                                           | 16,2   | 118               | 54            | 48           | 21            | 0,3          | 624           | 12              | 0,3 L           | 40 H            | 6,9        | 4,5 H          | 315 H           | 276             | 10,2            | 4,2               | 162 H            | 4,8              | 120              | 1,9              | 2,4       | 300             | 261           | 6               | 1,5           |                  |
| 1        | 177 L   | 7,1                                         | 36,8 L                                       | 12,4   | 1427 H            | 22            | 72           | 85 H          | 0,2          | 740           | 13              | 0,4 L           | 33 H            | 4,3 L      | 2,6 L          | 85              | 95              | 8,3 L           | 4,8               | 148              | 4                | 118              | 1,5              | 1,7       | 121             | 26 L          | < 5             | 1,5           |                  |
| 2        | 137 L   | 15,2                                        | 26,3 L                                       | 8,9 L  | 2811              | 51            | 128 H        | 122 H         | 0,1          | 423           | 11              | 0,3 L           | 37 H            | 4,7 L      | 2,8            | 82              | 101             | 8,6 L           | 3,5               | 146              | 4                | 121 H            | 1,5              | 1,9       | 93              | 25 L          | < 5             | 1,4 L         |                  |
| 3        | 142 L   | 18,4 H                                      | 35,5 L                                       | 12     | 1026 H            | 129           | 161 H        | 55            | 0,2          | 486           | 11              | 0,5             | 22              | 6,5        | 3,5            | 100             | 176             | 9,3             | 5,1               | 142              | 4                | 109              | 1,2              | 3         | 99              | 67            | 5               | 1,6           |                  |
| 4        | 207     | 13,6                                        | 38                                           | 13     | 400               | 136 H         | 147 H        | 31            | 0,2          | 502           | 10              | 0,5             | 20              | 6,6        | 3,5            | 114             | 167             | 9,8             | 5,1               | 145              | 4,1              | 111              | 1,1              | 3,1       | 90              | 46            | 5               | 1,5           |                  |
| 5        | 289     | 14,7                                        | 38,2                                         | 13,1   | 1889              | 105           | 131 H        | 32            | 0,1          | 565           | 13              | 0,6             | 22              | 6,5        | 3,4            | 91              | 146             | 9,5             | 5,5               | 145              | 4,6              | 111              | 1,1              | 3,1       | 78              | 59            | 5               | 1,5           |                  |
| 6        | 330     | 15,2                                        | 35,7 L                                       | 12,1   | 165               | 92            | 109          | 26            | 0,1          | 1042          | 14              | 0,5             | 28 H            | 6          | 3,2            | 96              | 127             | 9,6             | 5,8               | 148              | 4,6              | 114              | 1,1              | 2,8       | 219             | 52            | 5               | 1,5           |                  |
| 7        | 397     | 13                                          | 40,7                                         | 13,6   | 421               | 78            | 98           | 30            | 0,2          | 723           | 8               | 0,5             | 16              | 6,7        | 3,5            | 91              | 133             | 9,8             | 4,9               | 146              | 4,7              | 113              | 1,1              | 3,2       | 74 L            | 36            | 5               | 1,6           |                  |
| 8        | 384     | 11                                          | 42,2                                         | 13,8   | 238               | 71            | 86           | 24            | 0,1          | 799           | 11              | 0,6             | 18              | 6,5        | 3,5            | 93              | 121             | 9,9             | 5,4               | 145              | 4,9              | 111              | 1,2              | 3         | 86              | 37            | 7               | 1,9           |                  |
| 24       | 340     | 11,7                                        | 46,3                                         | 15,7   | 91                | 28            | 69           | 21            | 0,1          | 1087          | 12              | 0,7             | 17              | 6,6        | 3,7            | 93              | 134             | 10,3            | 4                 | 150              | 4,6              | 114              | 1,3              | 2,9       | 269             | 30            | < 5             | 1,5           |                  |
| 31       | 283     | 10,2                                        | 50,1                                         | 16,7   | 122               | 25            | 75           | 24            | 0,1          | 682           | 20              | 0,7             | 29 H            | 6,9        | 3,8            | 97              | 129             | 10              | 4,9               | 147              | 4,8              | 113              | 1,2              | 3,1       | 174             | 65            | < 5             | 1,6           |                  |
| 38       | 285     | 10,1                                        | 51,6                                         | 18,1 H | 131               | 24            | 116          | 50            | 0,1          | 772           | 18              | 0,7             | 26              | 6,8        | 3,7            | 107             | 116             | 9,7             | 4,7               | 145              | 4,4              | 117              | 1,2              | 3,1       | 164             | 65            | 5               | 1,6           |                  |
| 43       | 334     | 13,1                                        | 51,2                                         | 18     |                   |               |              |               |              |               |                 |                 |                 |            |                |                 |                 |                 |                   |                  |                  |                  |                  |           |                 |               |                 |               |                  |
| 51       | 256     | 8,7                                         | 47,6                                         | 16,8   |                   |               |              |               |              |               |                 |                 |                 |            |                |                 |                 |                 |                   |                  |                  |                  |                  |           |                 |               |                 |               |                  |
| 58       | 231     | 7,8                                         | 47,5                                         | 17,2   |                   |               |              |               |              |               |                 |                 |                 |            |                |                 |                 |                 |                   |                  |                  |                  |                  |           |                 |               |                 |               |                  |
| 65       | 256     | 9,3                                         | 50,1                                         | 18,1 H |                   |               |              |               |              |               |                 |                 |                 |            |                |                 |                 |                 |                   |                  |                  |                  |                  |           |                 |               |                 |               |                  |
| 72       | 230     | 8,9                                         | 53                                           | 19,6 H |                   |               |              |               |              |               |                 |                 |                 |            |                |                 |                 |                 |                   |                  |                  |                  |                  |           |                 |               |                 |               |                  |
| 79       | 247     | 8,7                                         | 51,4                                         | 18,2 H |                   |               |              |               |              |               |                 |                 |                 |            |                |                 |                 |                 |                   |                  |                  |                  |                  |           |                 |               |                 |               |                  |
| 86       | 220     | 8,2                                         | 53,4                                         | 19,1 H |                   |               |              |               |              |               |                 |                 |                 |            |                |                 |                 |                 |                   |                  |                  |                  |                  |           |                 |               |                 |               |                  |
| 115      | 208     | 8,1                                         | 49,8                                         | 17,4   |                   |               |              |               |              |               |                 |                 |                 |            |                |                 |                 |                 |                   |                  |                  |                  |                  |           |                 |               |                 |               |                  |
| 156      | 204     | 7,1                                         | 53,8                                         | 18,9 H |                   |               |              |               |              |               |                 |                 |                 |            |                |                 |                 |                 |                   |                  |                  |                  |                  |           |                 |               |                 |               |                  |
| 189      | 218     | 7,5                                         | 51,3                                         | 18,9 H | 74                | 21            | 84           | 19            | 0,1          | 823           | 14              | 0,8             | 18              | 6,4        | 3,7            | 99              | 132             | 10,3            | 3,3               | 147              | 4,3              | 111              | 1,4              | 2,7       | 330             | 30            | 5               | 1,7           |                  |
| 240      | 290     | 7,4                                         | 54,9                                         | 18     |                   |               |              |               |              |               |                 |                 |                 |            |                |                 |                 |                 |                   |                  |                  |                  |                  |           |                 |               |                 |               |                  |
| 275      | 236     | 8,4                                         | 58,2 H                                       | 17,8   | 87                | 30            | 83           | 18            | 0,1          | 1077          | 12              | 0,7             | 17              | 6,3        | 3,5            | 99              | 151             | 10,4            | 4                 | 147              | 4,6              | 111              | 1,3              | 2,8       | 459             | 36            | < 5             | 1,7           |                  |
| 310      | 234     | 9,4                                         | 58,5 H                                       | 18,2 H | 91                | 30            | 87           | 17            | 0,1          | 818           | 14              | 0,8             | 18              | 6,8        | 3,8            | 115             | 156             | 10,6            | 4,4               | 149              | 4,7              | 108              | 1,3              | 3         | 300             | 34            | < 5             | 1,8           |                  |
| 365      | 278     | 9,3                                         | 56,8 H                                       | 17,6   | 143               | 33            | 84           | 20            | 0,1          | 664           | 13              | 0,7             | 19              | 6,6        | 3,8            | 97              | 158             | 10,1            | 4,4               | 148              | 4,6              | 111              | 1,4              | 2,8       | 202             | 47            | < 5             | 1,7           |                  |
| 451      | 341     | 8,2                                         | 53,1                                         | 16,8   | 143               | 16            | 93           | 26            | 0,1          | 882           | 16              | 0,7             | 23              | 7,2        | 4              | 91              | 111             | 10,3            | 3,7               | 148              | 4,6              | 115              | 1,3              | 3,2       | 274             | 28 L          | 5               | 1,7           |                  |
| 549      | 319     | 7,5                                         | 58,5 H                                       | 17,6   | 231               | 14            | 88           | 27            | 0,2          | 428           | 10              | 0,7             | 14              | 6,7        | 3,8            | 99              | 112             | 9,6             | 3,9               | 149              | 4,6              | 114              | 1,3              | 2,9       | 79              | 38            | 5               | 1,7           |                  |
| 451      | 341     | 8,2                                         | 53,1                                         | 16,8   | 143               | 16            | 93           | 26            | 0,1          | 882           | 16              | 0,7             | 23              | 7,2        | 4              | 91              | 111             | 10,3            | 3,7               | 148              | 4,6              | 115              | 1,3              | 3,2       | 274             | 28 L          | 5               | 1,7           |                  |
| 549      | 319     | 7,5                                         | 58,5 H                                       | 17,6   | 231               | 14            | 88           | 27            | 0,2          | 428           | 10              | 0,7             | 14              | 6,7        | 3,8            | 99              | 112             | 9,6             | 3,9               | 149              | 4,6              | 114              | 1,3              | 2,9       | 79              | 38            | 5               | 1,7           |                  |
| 639      | 259     | 12,1                                        | 51,2                                         | 17,4   | 169               | 24            | 73           | 24            | 0,2          | 749           | 13              | 0,7             | 19              | 6,8        | 3,8            | 81              | 114             | 9,7             | 3,2               | 148              | 4,3              | 114              | 1,3              | 3         | 132             | 38            | 8               | 1,6           |                  |
| 730      | 283     | 7,5                                         | 50,5                                         | 15,5   | 127               | 23            | 81           | 27            | 0,1          | 602           | 14              | 0,6             | 23              | 6,3        | 3,6            | 93              | 139             | 9,7             | 3,7               | 143              | 4,5              | 113              | 1,3              | 2,7       | 128             | 40            | 4               | 1,5           |                  |

**Table S3: Blood cell counts and blood chemistry in O21.** The table shows the results of blood cell counts and blood chemistry parameters in O21 blood samples analyzed before (baseline) or at the indicated day after lentiviral vector administration (post LV). The reference normal range is indicated. Values lower than normal are shown in blue and followed by “L”; values higher than normal are shown in red and followed by “H”.

| Dog | Day      | PLT                                         | WBC                                          | HCT    | HGB               | CPK           | ALK PHOS     | ALT           | AST          | Tot Bili      | Amyl            | Urea N          | Creat           | BUN/ Creat | Total Protein  | Alb             | Glu             | Chol            | Ca+               | P                | Na+              | K+               | Cl-              | Alb/ Glob | Glob            | Lip           | Triglyc         | GGTP          | Mg+              |  |
|-----|----------|---------------------------------------------|----------------------------------------------|--------|-------------------|---------------|--------------|---------------|--------------|---------------|-----------------|-----------------|-----------------|------------|----------------|-----------------|-----------------|-----------------|-------------------|------------------|------------------|------------------|------------------|-----------|-----------------|---------------|-----------------|---------------|------------------|--|
| O59 | post-LV  | 200-500<br>10 <sup>3</sup> /mm <sup>3</sup> | 6.0-17.0<br>10 <sup>3</sup> /mm <sup>3</sup> | 37-55% | 12.0-18.0<br>g/dL | 59-895<br>U/L | 5-131<br>U/L | 12-118<br>U/L | 15-66<br>U/L | .1-3<br>mg/dL | 290-1125<br>U/L | 6.0-25<br>mg/dL | .5-1.6<br>mg/dL | 4.0-27     | 5.0-7.4<br>g/L | 2.7-4.4<br>g/dL | 70-136<br>mg/dL | 92-324<br>mg/dL | 8.9-11.4<br>mg/dL | 2.5-6.0<br>mg/dL | 139-154<br>mEq/L | 3.6-5.5<br>mEq/L | 102-120<br>mEq/L | .8-2.0    | 1.6-3.6<br>g/dL | 77-695<br>U/L | 29-291<br>mg/dL | 1.0-12<br>U/L | 1.5-2.5<br>mEq/L |  |
|     | Baseline | 221                                         | 9                                            | 52,7   | 17,9              | 289           | 26           | 48            | 30           | 0,1           | 508             | 14              | 0,7             | 20         | 5,6            | 3,7             | 108             | 119             | 9,3               | 3,3              | 145              | 3,8              | 111              | 1,9       | 1,9             | 199           | 38              | < 5           | 1,5              |  |
|     | 0.5      |                                             |                                              |        |                   | 621           | 20           | 62            | 64           | 0,2           | 344             | 9               | 0,5             | 6,4        | 6,4            | 3,9             | 101             | 140             | 10,4              | 3,5              | 151              | 4                | 119              | 1,6       | 2,5             | 253           | 16 L            | < 5           | 1,6              |  |
|     | 1        | 172 L                                       | 20.8 H                                       | 48,8   | 15                | 861           | 33           | 67            | 43           | 0,2           | 260 L           | 9               | 0,5             | 18         | 7.5 H          | 4,4             | 123             | 184             | 10,5              | 4,4              | 149              | 4                | 113              | 1,4       | 3,1             | 240           | 31              | < 5           | 1,8              |  |
|     | 2        | 213                                         | 19.5 H                                       | 51,5   | 16,1              | 257           | 44           | 88            | 37           | 0,2           | 199 L           | 14              | 0,6             | 23         | 7,3            | 4,2             | 108             | 220             | 10,1              | 3,9              | 146              | 4,5              | 103              | 1,4       | 3,1             | 199           | 80              | < 5           | 1,8              |  |
|     | 3        | 203                                         | 8,6                                          | 49,6   | 15,3              |               |              |               |              |               |                 |                 |                 |            |                |                 |                 |                 |                   |                  |                  |                  |                  |           |                 |               |                 |               |                  |  |
|     | 4        | 211                                         | 9,9                                          | 49,8   | 15,5              |               |              |               |              |               |                 |                 |                 |            |                |                 |                 |                 |                   |                  |                  |                  |                  |           |                 |               |                 |               |                  |  |
|     | 5        | 225                                         | 10,3                                         | 49,7   | 15,2              |               |              |               |              |               |                 |                 |                 |            |                |                 |                 |                 |                   |                  |                  |                  |                  |           |                 |               |                 |               |                  |  |
|     | 7        | 259                                         | 6                                            | 50,9   | 15,5              |               |              |               |              |               |                 |                 |                 |            |                |                 |                 |                 |                   |                  |                  |                  |                  |           |                 |               |                 |               |                  |  |
|     | 15       | 192 L                                       | 7,2                                          | 51,8   | 16,7              | 185           | 39           | 57            | 27           | 0,1           | 775             | 13              | 0,7             | 19         | 6,2            | 3,9             | 89              | 117             | 10,2              | 3,3              | 146              | 4,2              | 112              | 1,7       | 2,3             | 283           | 27 L            | 10            | 1.4 L            |  |
|     | 23       | 235                                         | 7,9                                          | 56.3 H | 17,5              |               |              |               |              |               |                 |                 |                 |            |                |                 |                 |                 |                   |                  |                  |                  |                  |           |                 |               |                 |               |                  |  |
|     | 30       | 226                                         | 10,8                                         | 55     | 16,8              | 144           | 18           | 35            | 25           | 0,1           | 763             | 12              | 0,5             | 24         | 6,3            | 3,5             | 92              | 110             | 9,4               | 3,9              | 145              | 4                | 108              | 1,3       | 2,8             | 150           | 28 L            | < 5           | 1,5              |  |
|     | 37       | 267                                         | 8,2                                          | 53,9   | 16,9              |               |              |               |              |               |                 |                 |                 |            |                |                 |                 |                 |                   |                  |                  |                  |                  |           |                 |               |                 |               |                  |  |
|     | 45       | 267                                         | 7,8                                          | 59.0 H | 17,8              |               |              |               |              |               |                 |                 |                 |            |                |                 |                 |                 |                   |                  |                  |                  |                  |           |                 |               |                 |               |                  |  |
|     | 50       | 266                                         | 8,1                                          | 54,6   | 16,6              |               |              |               |              |               |                 |                 |                 |            |                |                 |                 |                 |                   |                  |                  |                  |                  |           |                 |               |                 |               |                  |  |
|     | 56       | 252                                         | 7,2                                          | 57.3 H | 17,2              |               |              |               |              |               |                 |                 |                 |            |                |                 |                 |                 |                   |                  |                  |                  |                  |           |                 |               |                 |               |                  |  |
|     | 62       | 242                                         | 7,6                                          | 56.7 H | 17,4              |               |              |               |              |               |                 |                 |                 |            |                |                 |                 |                 |                   |                  |                  |                  |                  |           |                 |               |                 |               |                  |  |
|     | 70       | 234                                         | 8                                            | 56.9 H | 17,3              |               |              |               |              |               |                 |                 |                 |            |                |                 |                 |                 |                   |                  |                  |                  |                  |           |                 |               |                 |               |                  |  |
|     | 77       | 238                                         | 9,4                                          | 60.0 H | 18.2 H            |               |              |               |              |               |                 |                 |                 |            |                |                 |                 |                 |                   |                  |                  |                  |                  |           |                 |               |                 |               |                  |  |
|     | 92       | 232                                         | 7,8                                          | 55.4 H | 17,5              |               |              |               |              |               |                 |                 |                 |            |                |                 |                 |                 |                   |                  |                  |                  |                  |           |                 |               |                 |               |                  |  |
|     | 99       | 229                                         | 7,1                                          | 51,6   | 16,2              | 169           | 21           | 44            | 27           | 0,1           | 502             | 14              | 0,6             | 23         | 6,3            | 3,8             | 104             | 119             | 10,6              | 3,6              | 151              | 4,1              | 115              | 1,5       | 2,5             | 173           | 36              | < 5           | 1,5              |  |
|     | 118      | 230                                         | 6,4                                          | 55     | 17,3              |               |              |               |              |               |                 |                 |                 |            |                |                 |                 |                 |                   |                  |                  |                  |                  |           |                 |               |                 |               |                  |  |
|     | 146      | 236                                         | 7,1                                          | 54,1   | 16,7              |               |              |               |              |               |                 |                 |                 |            |                |                 |                 |                 |                   |                  |                  |                  |                  |           |                 |               |                 |               |                  |  |
|     | 197      | 239                                         | 7,6                                          | 57.0 H | 18.1 H            | 130           | 15           | 49            | 25           | 0,1           | 665             | 14              | 0,7             | 20         | 6,4            | 3,8             | 103             | 124             | 10,3              | 3,5              | 147              | 4,3              | 111              | 1,5       | 2,6             | 273           | 31              | < 5           | 1,5              |  |
|     | 239      | 247                                         | 7,8                                          | 58.8 H | 18.1 H            |               |              |               |              |               |                 |                 |                 |            |                |                 |                 |                 |                   |                  |                  |                  |                  |           |                 |               |                 |               |                  |  |
|     | 268      | 232                                         | 6,6                                          | 58.5 H | 18.8 H            | 136           | 16           | 55            | 22           | 0,2           | 530             | 13              | 0,7             | 19         | 5,9            | 3,6             | 96              | 109             | 10                | 3,3              | 146              | 4,5              | 112              | 1,6       | 2,3             | 227           | 35              | < 5           | 1,5              |  |
|     | 294      | 217                                         | 6,7                                          | 54     | 18.2 H            |               |              |               |              |               |                 |                 |                 |            |                |                 |                 |                 |                   |                  |                  |                  |                  |           |                 |               |                 |               |                  |  |
|     | 336      | 230                                         | 6,3                                          | 52,1   | 17,1              |               |              |               |              |               |                 |                 |                 |            |                |                 |                 |                 |                   |                  |                  |                  |                  |           |                 |               |                 |               |                  |  |
|     | 379      | 212                                         | 7,7                                          | 51,7   | 16,6              | 219           | 17           | 56            | 33           | 0,1           | 486             | 14              | 0,6             | 23         | 14             | 3,5             | 83              | 130             | 10,1              | 3,4              | 148              | 4                | 111              | 1,3       | 2,6             | 131           | 26 L            | 6             | 1,5              |  |
|     | 448      | 256                                         | 9,5                                          | 60.0 H | 18.6 H            | 182           | 15           | 74            | 32           | 0,1           | 562             | 23              | 0,7             | 33 H       | 6,1            | 4,2             | 88              | 121             | 9,9               | 4                | 144              | 4,3              | 106              | 2.2 H     | 1,9             | 164           | 95              | 4             | 1,6              |  |
|     | 535      | 218                                         | 7,3                                          | 55.4 H | 17,5              | 168           | 17           | 60            | 29           | 0,2           | 508             | 18              | 0,7             | 26         | 5,8            | 3,6             | 80              | 146             | 9,7               | 3,7              | 145              | 4,3              | 112              | 1,6       | 2,2             | 144           | 44              | 3             | 1,5              |  |
|     | 637      | 221                                         | 9,9                                          | 52,8   | 17,4              | 170           | 17           | 56            | 30           | 4             | 436             | 18              | 0,7             | 26         | 5,4            | 3,3             | 75              | 139             | 9,9               | 3,3              | 150              | 4,4              | 113              | 1,6       | 2,1             | 165           | 41              | 4             | 1,5              |  |

**Table S4: Blood cell counts and blood chemistry in O59.** The table shows the results of blood cell counts and blood chemistry parameters in O59 blood samples analyzed before (baseline) or at the indicated day after lentiviral vector administration (post LV). The reference normal range is indicated. Values lower than normal are shown in blue and followed by “L”; values higher than normal are shown in red and followed by “H”.

| <b>Dog</b> | <b>Day post LV</b> | <b>Swab</b> | <b>p24 (pg/mL)</b> |
|------------|--------------------|-------------|--------------------|
| O21        | 0                  | Oral        | ND                 |
| O21        | 0                  | Nasal       | ND                 |
| O21        | 0                  | Lachrymal   | ND                 |
| O21        | 0                  | Genital     | ND                 |
| O21        | 0                  | Rectal      | ND                 |
| O21        | 1                  | Oral        | ND                 |
| O21        | 1                  | Nasal       | 150                |
| O21        | 1                  | Lachrymal   | ND                 |
| O21        | 1                  | Genital     | ND                 |
| O21        | 1                  | Rectal      | ND                 |
| O21        | 2                  | Oral        | ND                 |
| O21        | 2                  | Nasal       | ND                 |
| O21        | 2                  | Lachrymal   | ND                 |
| O21        | 2                  | Genital     | ND                 |
| O21        | 2                  | Rectal      | ND                 |
| O21        | 3                  | Oral        | ND                 |
| O21        | 3                  | Nasal       | ND                 |
| O21        | 3                  | Lachrymal   | ND                 |
| O21        | 3                  | Genital     | ND                 |
| O21        | 3                  | Rectal      | ND                 |
| O21        | 4                  | Oral        | ND                 |
| O21        | 4                  | Nasal       | ND                 |
| O21        | 4                  | Lachrymal   | ND                 |
| O21        | 4                  | Genital     | ND                 |
| O21        | 4                  | Rectal      | ND                 |
| O21        | 5                  | Oral        | ND                 |
| O21        | 5                  | Nasal       | ND                 |
| O21        | 5                  | Lachrymal   | ND                 |
| O21        | 5                  | Genital     | ND                 |
| O21        | 5                  | Rectal      | ND                 |
| O21        | 6                  | Oral        | ND                 |
| O21        | 6                  | Nasal       | ND                 |
| O21        | 6                  | Lachrymal   | ND                 |
| O21        | 6                  | Genital     | ND                 |
| O21        | 6                  | Rectal      | ND                 |
| O21        | 7                  | Oral        | ND                 |
| O21        | 7                  | Nasal       | ND                 |
| O21        | 7                  | Lachrymal   | ND                 |
| O21        | 7                  | Genital     | ND                 |
| O21        | 7                  | Rectal      | ND                 |
| O21        | 8                  | Oral        | ND                 |
| O21        | 8                  | Nasal       | ND                 |
| O21        | 8                  | Lachrymal   | ND                 |
| O21        | 8                  | Genital     | ND                 |
| O21        | 8                  | Rectal      | ND                 |
| O59        | 0                  | Oral        | ND                 |
| O59        | 0                  | Nasal       | ND                 |
| O59        | 0                  | Lachrymal   | ND                 |
| O59        | 0                  | Genital     | ND                 |
| O59        | 0                  | Rectal      | ND                 |
| O59        | 1                  | Oral        | ND                 |
| O59        | 1                  | Nasal       | ND                 |
| O59        | 1                  | Lachrymal   | ND                 |
| O59        | 1                  | Genital     | ND                 |
| O59        | 1                  | Rectal      | ND                 |
| O59        | 2                  | Oral        | ND                 |
| O59        | 2                  | Nasal       | ND                 |

|     |   |           |    |
|-----|---|-----------|----|
| O59 | 2 | Lachrymal | ND |
| O59 | 2 | Genital   | ND |
| O59 | 2 | Rectal    | ND |
| O59 | 3 | Oral      | ND |
| O59 | 3 | Nasal     | ND |
| O59 | 3 | Lachrymal | ND |
| O59 | 3 | Genital   | ND |
| O59 | 3 | Rectal    | ND |
| O59 | 4 | Oral      | ND |
| O59 | 4 | Nasal     | ND |
| O59 | 4 | Lachrymal | ND |
| O59 | 4 | Genital   | ND |
| O59 | 4 | Rectal    | ND |
| O59 | 5 | Oral      | ND |
| O59 | 5 | Nasal     | ND |
| O59 | 5 | Lachrymal | ND |
| O59 | 5 | Genital   | ND |
| O59 | 5 | Rectal    | ND |
| O59 | 6 | Oral      | ND |
| O59 | 6 | Nasal     | ND |
| O59 | 6 | Lachrymal | ND |
| O59 | 6 | Genital   | ND |
| O59 | 6 | Rectal    | ND |
| O59 | 7 | Oral      | ND |
| O59 | 7 | Nasal     | ND |
| O59 | 7 | Lachrymal | ND |
| O59 | 7 | Genital   | ND |
| O59 | 7 | Rectal    | ND |
| O59 | 8 | Oral      | ND |
| O59 | 8 | Nasal     | ND |
| O59 | 8 | Lachrymal | ND |
| O59 | 8 | Genital   | ND |
| O59 | 8 | Rectal    | ND |

**Table S5. Lentiviral vector particles in swabs from O21 and O59 dogs.** The table shows the results of HIV Gag p24 ELISA, performed to detect the presence of lentiviral vector particles in oral, nasal, lachrymal, genital or rectal swabs, as indicated, taken from O21 or O59 dogs at the indicate day after lentiviral vector administration (post LV). ND: not detectable. Please note that the limit of detection for this assay is 3 pg/mL. Samples were assayed at a 1:5 and 1:50 dilution.

| <b>Animal</b>                             | <b>Spontaneous bleedings</b> | <b>Months of observation</b> | <b>Frequency</b>    |
|-------------------------------------------|------------------------------|------------------------------|---------------------|
| M57 – treated                             | 7                            | 61                           | 0.115               |
| O21 – treated                             | 2                            | 30                           | 0.067               |
| O59 – treated                             | 0                            | 21                           | 0                   |
| <b><i>Treated</i></b>                     | <b><i>9</i></b>              | <b><i>112</i></b>            | <b><i>0.08</i></b>  |
|                                           |                              |                              |                     |
| V63 – untreated                           | 12                           | 24                           | 0.5                 |
| X02 – untreated                           | 29                           | 24                           | 1.208               |
| X06 – untreated                           | 11                           | 24                           | 0.458               |
| Y21 – untreated                           | 22                           | 16.6                         | 1.325               |
| E19 – untreated                           | 9                            | 24                           | 0.375               |
| Z100 – untreated                          | 6                            | 15.2                         | 0.395               |
| Z58 – untreated                           | 8                            | 15.2                         | 0.526               |
| Y24 – untreated                           | 7                            | 24                           | 0.292               |
| Z91 – untreated                           | 3                            | 24                           | 0.125               |
| E30 – untreated                           | 6                            | 24                           | 0.25                |
| <b><i>Untreated</i></b>                   | <b><i>113</i></b>            | <b><i>215</i></b>            | <b><i>0.526</i></b> |
|                                           |                              |                              |                     |
| 2-sample test for equality of proportions |                              |                              | $P < 0.0001$        |

**Table S6. Bleeding frequency in treated and untreated dogs with hemophilia B.** The table shows the occurred spontaneous bleedings, months of observation and the resulting bleeding frequency calculated for the 3 treated and 10 untreated (individually and together) hemophilia B dogs from the same colony. Data on untreated dogs from (46).

| <b>Dog</b>   | <b>R (min)</b> | <b>K (min)</b> | <b>Angle (deg)</b> | <b>MA (mm)</b> |
|--------------|----------------|----------------|--------------------|----------------|
| Hemophilia B | >60            | -              | -                  | -              |
| M57          | 17.4           | 4.2            | 44.5               | 58.5           |
| O21          | 12.7           | 4.1            | 36.9               | 52.3           |
| O59          | 11.7           | 3.5            | 45.6               | 52.2           |
| Normal range | 3.3 – 10.2     | 1 – 4.4        | 41.1 – 77.7        | 49.9 – 72.5    |

**Table S7: Thromboelastography in treated dogs with hemophilia B.** The table shows the results of thromboelastography performed on plasma from treated dogs (at least 2 months after gene therapy) and from 5 dogs with hemophilia B or 21 normal dogs for comparison. R: reaction time (minutes) to the first evidence of clot. K: time (minutes) to reach 20 mm of clot amplitude. Angle: tangent to the curve made as 20 mm of clot amplitude are reached (degrees). MA: maximal amplitude of the clot (millimeters).



| <b>Sample</b>        | <b>aPTT mixing assay (seconds)</b> |
|----------------------|------------------------------------|
| M57 baseline         | 17.7                               |
| M57 day 50 post LV   | 18.0                               |
| Positive control     | 24.2                               |
| Negative control     | 17.7                               |
| M57 day 1486 post LV | < 20                               |
| O21 day 549 post LV  | < 20                               |
| O59 day 268 post LV  | < 20                               |
| Positive control     | 22.3                               |
| Negative control     | < 20                               |

**Table S8: Inhibitor screen in treated dogs with hemophilia B.** The table shows the results of inhibitor screen in treated dogs with hemophilia B at baseline or at the indicated day after lentiviral vector administration (post LV). Plasma samples from treated dogs were screened for anti-factor IX neutralizing antibodies using an activated partial thromboplastin time (aPTT) mixing assay (13). Control plasmas with known Bethesda Units titer of 2.6 (positive control) and with no inhibitors (negative control) were assayed concurrently for comparison.

**Table S9: Mice with hemophilia B transduced with SIN.ET as adults.**

Experimental details are shown for each mouse. Experimental group: “early” if euthanized <3 months or “late” if euthanized between 6-12 months after lentiviral vector administration. VCN: vector copy number.

**Table S10: Integration sites retrieved from mice with hemophilia B transduced with SIN.ET as adults.**

A) Integration sites retrieved from the “early” experimental group. B) Integration sites retrieved from the “late” experimental group. “Refseq gene” is the Refseq symbol of the closest gene to the integration site.

**Table S11. CIS identified in the dataset of integration sites retrieved from mice with hemophilia B transduced as adults.**

A) CIS from the “early” experimental group; B) CIS from the “late” experimental group. C) Summary of the non-redundant CIS genes targeted in each of the 2 experimental groups (as used to draw Venn diagrams). The “Targeted gene” is the Refseq symbol of the gene that was most frequently associated to the integration site within each CIS. “CIS span” is the distance between the most telomeric and the most centromeric integration site that constitute the CIS, expressed in kb. “CIS power” is the number of different integration sites within each CIS. The table shows all the significant CIS after Grubb’s test. The p-value of the genome-wide Grubb’s test is shown in the last column; the significant CIS are outlined in pink background.

**Table S12. List of *Cdkn2a*<sup>-/-</sup>*Ifnar1*<sup>-/-</sup> and wildtype mice transduced with SIN.ET or ET.LTR as neonates.**

Experimental details are shown for each mouse. Multiple tumors collected from the same mouse are shown in different columns with the relative vector copy number (VCN). NA: not analyzed. NS: not sampled. TU: transducing units.

**Table S13: Integration sites retrieved from tumor-prone mice transduced as neonates.**

A) Integration sites retrieved from HCCs induced by ET.LTR in *Cdkn2a*<sup>-/-</sup>*Ifnar1*<sup>-/-</sup> mice. B) Integration sites retrieved from non-tumoral liver of *Cdkn2a*<sup>-/-</sup>*Ifnar1*<sup>-/-</sup> mice transduced with ET.LTR. C) Integration sites retrieved from liver of *Cdkn2a*<sup>-/-</sup>*Ifnar1*<sup>-/-</sup> mice transduced with SIN.ET. D) Integration sites retrieved from HCCs induced by ET.LTR in wildtype mice. E) Integration sites retrieved from non-tumoral

liver of wildtype mice transduced with ET.LTR. F) Integration sites retrieved from liver of wildtype mice transduced with SIN.ET. “Refseq gene” is the Refseq symbol of the closest gene to the integration site. G) Summary of samples from which integration sites retrieval was performed. The correspondence with the sample indicated in A-F in this table and the mouse ID (see Table S12) is indicated.

**Table S14: CIS identified in the dataset of integration sites retrieved from tumor-prone mice transduced as neonates.** A) CIS identified in each of the 6 different integration datasets (see Table S13). The “Targeted gene” is the Refseq symbol of the gene that was most frequently associated to the integration site within each specific CIS. “CIS span” is the distance between the most telomeric and the most centromeric integration site that constitute the CIS, expressed in base pairs. “CIS power” is the number of different integration sites within each CIS. “Tot CIS reads” is the sum of the sequence counts of all the different integration sites within a CIS. “% reads” is the ratio between the “Tot CIS reads” of each CIS and the total number of reads obtained in that integration dataset, expressed as % (the 6 integration datasets are showed in Table S13). The p-value of the genome-wide Grubb’s test is shown in the last column; the significant CIS are outlined in pink background. B) Summary of the non-redundant CIS genes targeted by each lentiviral vector (as used to draw Venn diagrams).
